# Supplementary material for: A multicentre randomized controlled trial of an empowerment-inspired intervention for adolescents starting continuous subcutaneous insulin infusion - a study protocol
Source: Springer Nature journal article supplement (doi:10.1186/1471-2431-13-212), 2013-12-01

**Inclusion criteria:**

Adolescents starting CSII in Stockholm, Sweden

Age 12-17.99 years

**Exclusion criteria:**

Diabetesduration &lt; 1 year; HbA1c &lt; 63; Insulin requirement &lt; 0,5 E/kg; insufficient knowledge of the Swedish language; CGM at start or during study period

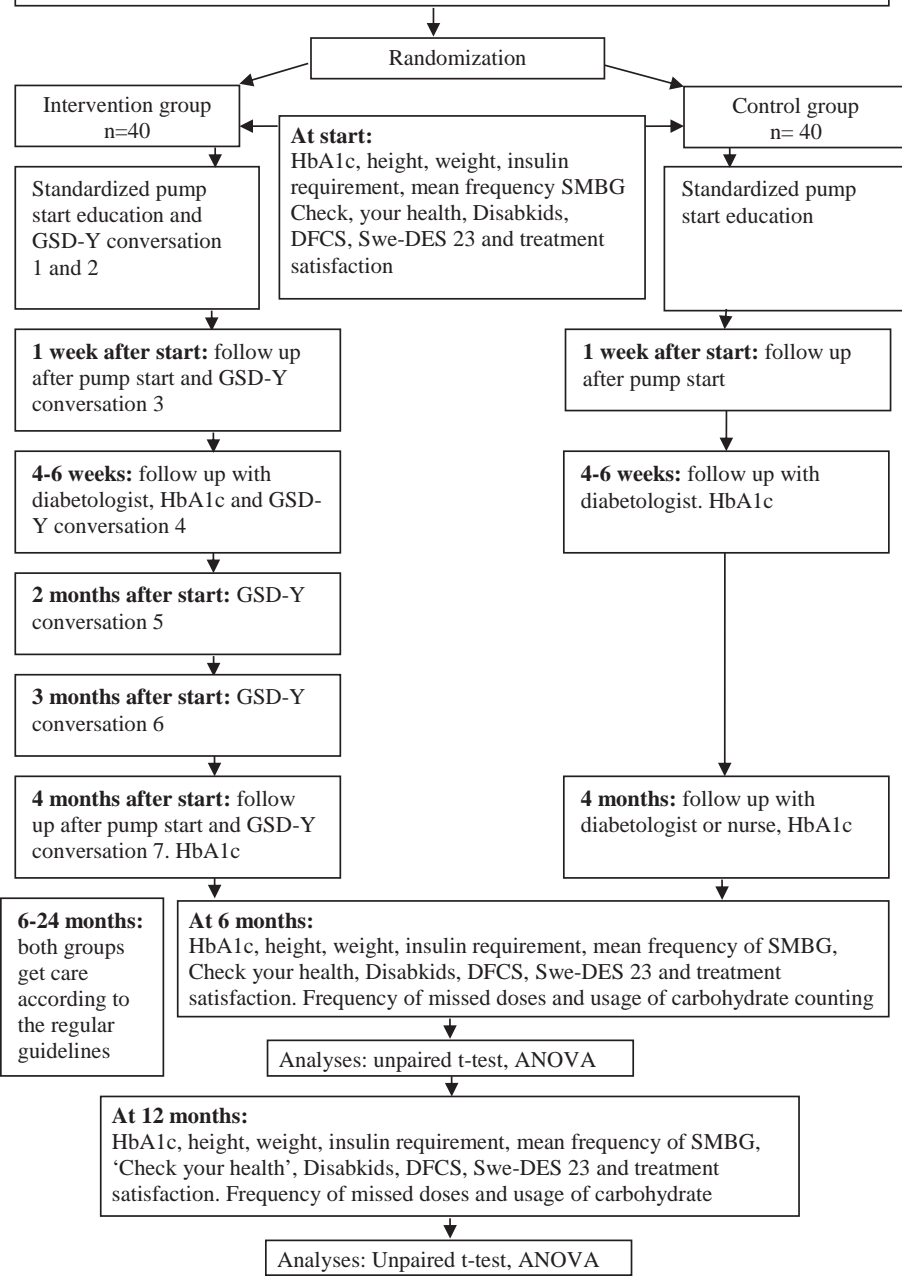

Supplement: 12887_2013_943_MOESM1_ESM.pdf [file 12887_2013_943_MOESM1_ESM.pdf]
